# Supplementary material
Source: PubMed Central journal article supplement (PMC8893973)
Supplement: JCOPDF-9-68-s001.pdf [file JCOPDF-9-68-s001.pdf]

## Online Supplement

### Higher COPD Assessment Test Score Associated With Greater Exacerbations Risk: A Post Hoc Analysis of the IMPACT Trial

Byron Thomashow, MD<sup>1</sup> Marjorie Stiegler, MD<sup>2,3</sup> Gerard J. Criner, MD, FCCP<sup>4</sup> Mark T. Dransfield, MD<sup>5</sup> David M.G. Halpin, MD<sup>6</sup> MeiLan K. Han, MD<sup>7</sup> Peter Lange, MD<sup>8,9</sup> Fernando J. Martinez, MD<sup>10</sup> Dawn Midwinter, MSc<sup>11</sup> Dave Singh, MD<sup>12</sup> Maggie Tabberer, MSc<sup>11\*</sup> Robert A. Wise, MD<sup>13</sup> David A. Lipson, MD<sup>14,15</sup> Paul Jones, MD<sup>11\*</sup>

#### Affiliations:

<sup>1</sup> Division of Pulmonary, Allergy, and Critical Care, Columbia University Medical Center, New York, New York, United States

<sup>2</sup> School of Medicine, University of North Carolina at Chapel Hill, Chapel Hill, North Carolina, United States

<sup>3</sup> GlaxoSmithKline, Research Triangle Park, North Carolina, United States

<sup>4</sup> Lewis Katz School of Medicine at Temple University, Philadelphia, Pennsylvania, United States

<sup>5</sup> Lung Health Center, Division of Pulmonary, Allergy, and Critical Care Medicine, , University of Alabama at Birmingham, Birmingham, Alabama, United States

<sup>6</sup> University of Exeter Medical School, College of Medicine and Health, University of Exeter, Exeter, United Kingdom

<sup>7</sup> Pulmonary and Critical Care, University of Michigan, Ann Arbor, Michigan, United States

<sup>8</sup> Section of Epidemiology, Department of Public Health, University of Copenhagen, Copenhagen, Denmark

<sup>9</sup> Medical Department, Copenhagen University Hospital - Herlev and Gentofte, Herlev, Denmark

<sup>10</sup> Weill Cornell Medicine, New York, New York, United States

<sup>11</sup> GlaxoSmithKline, Brentford, Middlesex, United Kingdom

<sup>12</sup> Centre for Respiratory Medicine and Allergy, Institute of Inflammation and Repair, Manchester Academic Health Science Centre, University of Manchester, Manchester University NHS Foundation Trust, Manchester, United Kingdom

<sup>13</sup> Division of Pulmonary and Critical Care Medicine, Johns Hopkins University School of Medicine, Baltimore, Maryland, United States

<sup>14</sup>GlaxoSmithKline, Collegeville, Pennsylvania, United States

<sup>15</sup> Pulmonary, Allergy, and Critical Care Division, Perelman School of Medicine, University of Pennsylvania, Philadelphia, Pennsylvania, United States

\*Affiliation at the time of the study

**Table S1: Incidence of on-treatment AESIs by CAT score subgroup\***

| AESI                                   | FF/UMEC/VI          |                     | FF/VI               |                     | UMEC/VI             |                    |
|----------------------------------------|---------------------|---------------------|---------------------|---------------------|---------------------|--------------------|
|                                        | CAT <20<br>(n=2429) | CAT ≥20<br>(n=1647) | CAT <20<br>(n=2327) | CAT ≥20<br>(n=1720) | CAT <20<br>(n=1196) | CAT ≥20<br>(n=838) |
| Total duration at risk (subject-years) | 2198.8              | 1450.0              | 1976.7              | 1412.1              | 998.7               | 671.2              |
| Anticholinergic syndrome (SMQ)         |                     |                     |                     |                     |                     |                    |
| n (%)                                  | 100 (4)             | 76 (5)              | 78 (3)              | 57 (3)              | 37 (3)              | 33 (4)             |
| Event rate (#)                         | 55.0 (121)          | 65.5 (95)           | 47.0 (93)           | 46.0 (65)           | 45.1 (45)           | 53.6 (36)          |
| Asthma/bronchospasm (SMQ)              |                     |                     |                     |                     |                     |                    |
| n (%)                                  | 8 (<1)              | 19 (1)              | 21 (<1)             | 13 (<1)             | 13 (1)              | 3 (<1)             |
| Event rate (#)                         | 3.6 (8)             | 13.8 (20)           | 11.1 (22)           | 9.2 (13)            | 13.0 (13)           | 4.5 (3)            |
| Cardiovascular effects                 |                     |                     |                     |                     |                     |                    |
| n (%)                                  | 246 (10)            | 198 (12)            | 222 (10)            | 200 (12)            | 114 (10)            | 109 (13)           |
| Event rate (#)                         | 143.3 (315)         | 204.8 (297)         | 142.7 (282)         | 176.3 (249)         | 146.2 (146)         | 202.6 (136)        |

|                                                                            |                        |                        |                       |                        |                     |                     |
|----------------------------------------------------------------------------|------------------------|------------------------|-----------------------|------------------------|---------------------|---------------------|
| Decreased BMD and associated fractures<br>n (%)<br>Event rate (#)          | 47 (2)<br>22.7 (50)    | 50 (3)<br>48.3 (70)    | 46 (2)<br>25.3 (50)   | 38 (2)<br>29.7 (42)    | 21 (2)<br>22.0 (22) | 15 (2)<br>28.3 (19) |
| Effects on potassium<br>n (%)<br>Event rate (#)                            | 17 (<1)<br>7.7 (17)    | 17 (1)<br>11.7 (17)    | 9 (<1)<br>4.6 (9)     | 16 (<1)<br>12 (17)     | 2 (<1)<br>2.0 (2)   | 6 (<1)<br>8.9 (6)   |
| Gastrointestinal obstruction (SMQ)<br>n (%)<br>Event rate (#)              | 4 (<1)<br>1.8 (4)      | 4 (<1)<br>3.4 (5)      | 3 (<1)<br>1.5 (3)     | 7 (<1)<br>5.0 (7)      | 0<br>0              | 1 (<1)<br>1.5 (1)   |
| Hyperglycemia/new-onset diabetes mellitus (SMQ)<br>n (%)<br>Event rate (#) | 80 (3)<br>39.6 (87)    | 70 (4)<br>60.0 (87)    | 60 (3)<br>33.9 (67)   | 55 (3)<br>43.9 (62)    | 33 (3)<br>34.0 (34) | 39 (5)<br>65.6 (44) |
| Hypersensitivity<br>n (%)<br>Event rate (#)                                | 113 (5)<br>58.7 (129)  | 83 (5)<br>68.3 (99)    | 109 (5)<br>63.7 (126) | 83 (5)<br>67.3 (95)    | 55 (5)<br>57.1 (57) | 37 (4)<br>61.1 (41) |
| LRTI excluding pneumonia<br>n (%)<br>Event rate (#)                        | 104 (4)<br>51.8 (114)  | 95 (6)<br>81.4 (118)   | 106 (5)<br>63.7 (126) | 90 (5)<br>79.3 (112)   | 59 (5)<br>64.1 (64) | 48 (6)<br>95.3 (64) |
| Local steroid effects<br>n (%)<br>Event rate (#)                           | 192 (8)<br>107.8 (237) | 138 (8)<br>124.8 (181) | 162 (7)<br>98.1 (194) | 133 (8)<br>120.4 (170) | 58 (5)<br>75.1 (75) | 49 (6)<br>89.4 (60) |
| Ocular effects<br>n (%)<br>Event rate (#)                                  | 34 (1)<br>16.8 (37)    | 18 (1)<br>15.2 (22)    | 32 (1)<br>18.7 (37)   | 13 (<1)<br>9.9 (14)    | 20 (2)<br>20.0 (20) | 5 (<1)<br>7.4 (5)   |
| Pneumonia<br>n (%)<br>Event rate (#)                                       | 175 (7)<br>91.4 (201)  | 138 (8)<br>104.1 (151) | 170 (7)<br>98.7 (195) | 120 (7)<br>96.3 (136)  | 55 (5)<br>59.1 (59) | 40 (5)<br>64.1 (43) |
| Tremor<br>n (%)<br>Event rate (#)                                          | 3 (<1)<br>1.4 (3)      | 5 (<1)<br>3.4 (5)      | 3 (<1)<br>1.5 (3)     | 1 (<1)<br>0.7 (1)      | 2 (<1)<br>2.0 (2)   | 3 (<1)<br>4.5 (3)   |
| Urinary retention<br>n (%)<br>Event rate (#)                               | 4 (<1)<br>2.7 (6)      | 4 (<1)<br>2.8 (4)      | 7 (<1)<br>3.5 (7)     | 5 (<1)<br>3.5 (5)      | 6 (<1)<br>6.0 (6)   | 3 (<1)<br>4.5 (3)   |

\*Baseline CAT scores were assessed on the randomization study visit (Day 1), approximately 2 weeks following the screening visit. Event rate is per 1000 subject-years, calculated as the number of events x 1000, divided by the total duration at risk. AESI (AEs which have specified areas of interest for FF, UMEC or VI or for patients with COPD); AESI, adverse events of special

interest; BMD, bone mineral density; CAT, COPD assessment test; FF, fluticasone furoate; LRTI, lower respiratory tract infection; MedDRA, Medical Dictionary for Regulatory Activities; n, number of patients; SMQ, Standardized MedDRA Query; UMEC, umeclidinium; VI, vilanterol; #, number of events.
